# Supplementary material
Source: PubMed Central journal article supplement (PMC5389537)
Supplement: gkw1293_Supp.pdf [file gkw1293_Supp.pdf]

**Two *de novo* SNV proteins of Top3 $\beta$  from autism and schizophrenia patients have nuclear and cytoplasmic localization similar to that of the wildtype protein**

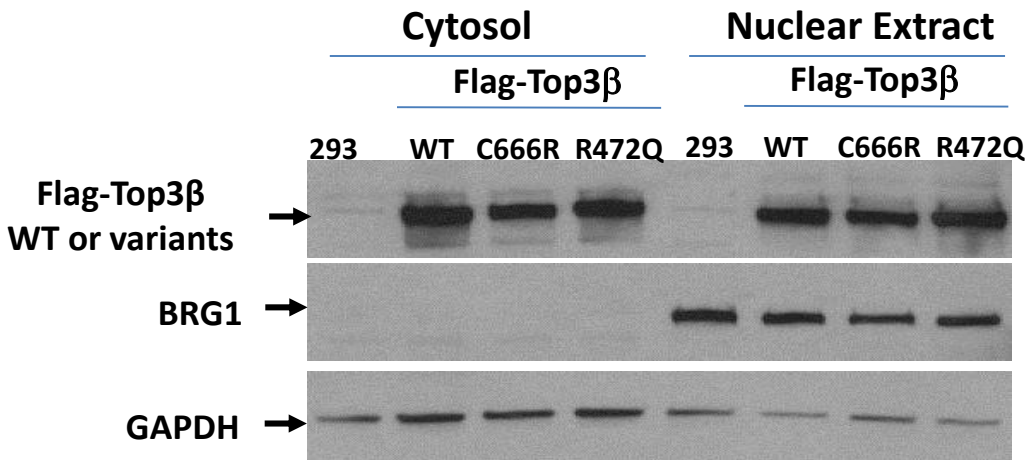

**Fig. S1: Two *de novo* SNV proteins of Top3 $\beta$  from autism and schizophrenia patients have nuclear and cytoplasmic localization similar to that of the wildtype protein.** Immunoblotting shows that both Top3b variant proteins, C666R and R472Q, are present in nuclear and cytosolic fractions of human HEK293 cells; and their distribution is similar to that of the wildtype protein. All three Top3b proteins are tagged with the Flag-epitope and transiently expressed in HEK293 cells. They were detected by immunoblotting with a Flag antibody. BRG1 is a chromatin-remodeling protein and used here to mark the nuclear fraction. GAPDH is a marker for cytosol. A small amount of GAPDH was detected in the nuclear extract, which suggests that there may some contamination of nuclear extract by the cytosolic proteins.
